# Supplementary material for: Microglia and CD206+ border-associated mouse macrophages maintain their embryonic origin during Alzheimer’s disease
Source: eLife. 2021 Oct 5;10:e71879. doi: 10.7554/eLife.71879 (PMC8523151; doi:10.7554/eLife.71879)
Supplement: Figure 1—figure supplement 1—source data 1. [file elife-71879-fig1-figsupp1-data1.xlsx]

## Sheet: Sheet1
Figure 1- figure supplement 1C		P2RY12(low)CD11c+ Microglia (%)
		Mouse age(months)	WT				APP-KI
		3	0.17	0.12	0.15		0.21	0.22	0.19
		6	0.47	0.52	0.82		3.43	4.01	4.07
		9	1.51	1.47	1.19		9.25	7.74	7.61
