# Supplementary material for: Microglia and CD206+ border-associated mouse macrophages maintain their embryonic origin during Alzheimer’s disease
Source: eLife. 2021 Oct 5;10:e71879. doi: 10.7554/eLife.71879 (PMC8523151; doi:10.7554/eLife.71879)
Supplement: Figure 1—figure supplement 2—source data 1. [file elife-71879-fig1-figsupp2-data1.xlsx]

## Sheet: Sheet1
Fig1 supplement 2B	WT 2 months	APP-2 months
Absolute number	total CD45+ cells
	392184	413836
	442366	383415
	432918	320618
	394710	465079
	Microglia
	350081	347749
	391764	332676
	385948	273043
	365075	409574
	CD11c+ Microglia
	409	290
	454	291
	252	256
	429	452
	Monocytes
	665	1087
	793	817
	850	942
	544	1497
	MdCs
	1160	1068
	1349	1310
	1544	948
	773	1103
	cDCs
	210	158
	274	143
	407	109
	91	168
	CD11a+
	1393	2479
	1945	1979
	1945	1711
	1903	5404
	Neutrophils
	1077	1566
	1346	1641
	1249	1812
	1642	2783
	Eosinophis
	49	47
	112	170
	138	101
	179	156
