# Supplementary material for: Microglia and CD206+ border-associated mouse macrophages maintain their embryonic origin during Alzheimer’s disease
Source: eLife. 2021 Oct 5;10:e71879. doi: 10.7554/eLife.71879 (PMC8523151; doi:10.7554/eLife.71879)
Supplement: Figure 1—source data 1. [file elife-71879-fig1-data1.xlsx]

## Sheet: Sheet1
Figure 1E	WT 2 months	WT 12 months	APP-KI 12 months
Absolute number	total CD45+ cells
	392184	347141	756557
	442366	427687	627111
	432918	361645	565492
	394710	331105	643024
	Microglia
	350081	300099	685643
	391764	378039	520877
	385948	293584	501081
	365075	297273	565349
	CD11c+ Microglia
	409	3298	86091
	454	3033	61393
	252	1255	58074
	429	1183	70296
	Monocytes
	665	749	1386
	793	820	3372
	850	1330	669
	544	1019	1514
	MdCs
	1160	1268	981
	1349	1015	726
	1544	1386	967
	773	1283	799
	cDCs
	210	310	663
	274	334	539
	407	340	842
	91	324	568
	CD11a+
	1393	1095	1708
	1945	1132	4148
	1945	2445	1230
	1903	1381	2679
	Neutrophils
	1077	1197	1713
	1346	1386	11465
	1249	2037	1032
	1642	3047	3865
	Eosinophis
	49	144	265
	112	177	292
	138	541	150
	179	319	172
