# Supplementary material for: Microglia and CD206+ border-associated mouse macrophages maintain their embryonic origin during Alzheimer’s disease
Source: eLife. 2021 Oct 5;10:e71879. doi: 10.7554/eLife.71879 (PMC8523151; doi:10.7554/eLife.71879)
Supplement: Figure 2—figure supplement 2—source data 1. [file elife-71879-fig2-figsupp2-data1.xlsx]

## Sheet: Sheet1
Figure.2 figure supplement 2	WT 2 months	WT 12 months	APP-KI 12 months
	Dura mater CD11a+ (% of CD45+ cells)
	1.192	0.452	0.57
	1.405	0.367	0
	0.88	0.679	0.696
	1.071	1.3	0.449
	Dura mater DCs (% of CD45+ cells)
	4.9	1.95	0.99
	1.05	1.25	2.64
	2.41	1.14	4.19
	1.22	1.08	2.5
	Dura mater Neutrophils (% of CD45+ cells)
	5.87	9.4	18.64
	17.06	21.56	8.23
	12.41	30.97	7.81
	11.22	28.89	5.76
	Dura mater Eosinophils (% of CD45+ cells)
	0.54	0.15	0.31
	0.15	0.2	0.33
	0.14	0.33	0.21
	0.28	0.46	0.53
	Subdural Meninges CD11a+ (% of CD45+ cells)
	0.823	0.337	0.851
	2.057	0.12	0.236
	0.577	0.078	0.201
	0.613	0.132	0.315
	Subdural Meninges DCs (% of CD45+ cells)
	9.13	2.08	1.82
	7.2	3.5	1.8
	7.03	5.36	1.43
	2.57	3.01	2.16
	Subdural Meninges Neutrophils (% of CD45+ cells)
	1.189	0.434	1.47
	0.618	0.38	0.17
	1.585	0.383	0.64
	0.968	0.573	0.8
	Subdural Meninges Eosinophils (% of CD45+ cells)
	0.076	0.013	0.05
	0.012	0	0.01
	0.016	0.011	0.03
	0.02	0.044	0.02
	Choroid Plexus CD11a+ (% of CD45+ cells)
	0.941	0.551	0.765
	0.995	0.154	1.775
	1.157	0.591	0.521
	0.267	0.207	0.141
	Choroid Plexus DCs (% of CD45+ cells)
	2.45	1.04	2.6
	1.86	3.11	1.49
	1.36	3.45	1.2
	0.53	2.8	2.65
	Choroid Plexus Neutrophils (% of CD45+ cells)
	2.63	1.3	2.91
	1.28	0.88	1.26
	0.98	0.24	0.57
	0.98	1.04	0.39
	Choroid Plexus Eosinophils (% of CD45+ cells)
	0.113	0.065	0.061
	0.022	0.038	0
	0.029	0.095	0.013
	0	0	0
