# Supplementary material for: Microglia and CD206+ border-associated mouse macrophages maintain their embryonic origin during Alzheimer’s disease
Source: eLife. 2021 Oct 5;10:e71879. doi: 10.7554/eLife.71879 (PMC8523151; doi:10.7554/eLife.71879)
Supplement: Figure 2—source data 1. [file elife-71879-fig2-data1.xlsx]

## Sheet: Sheet1
Figure 2C	WT 2 months	WT 12 months	APP-KI 12 months
	Dura mater CD206+MHCII low (% of CD45+ cells)
	4.27	1.68	1.66
	0.86	2	3.54
	2.41	1.21	5.65
	2.61	1.42	5.04
	Dura mater CD206+MHCII+ (% of CD45+ cells)
	1.01	3.97	1.71
	0.44	3.32	2.6
	1.48	3.35	6.6
	0.82	3.05	4
	Dura mater MdCs (% of CD45+ cells)
	0.65	1.28	3.06
	0.58	2.72	1.59
	0.93	3.6	2.42
	1.61	0.72	2.08
	Dura mater Monocyes (% of CD45+ cells)
	3.46	2.89	1.13
	5.83	1.66	2.13
	3.59	0.65	1.8
	3.37	3.99	1.04
	Subdural Meninges CD206+MHCII low(% of CD45+ cells)
	44.27	32.64	40.79
	44.65	33.62	43.77
	30.97	28.73	39.6
	48.62	28.89	30.36
	Subdural Meninges CD206+MHCII+ (% of CD45+ cells)
	1.04	9.36	7.53
	1.41	5.36	12.59
	2.73	10.24	6.95
	1.9	7.39	6.58
	Subdural Meninges MdCs (% of CD45+ cells)
	1.25	1.03	0.76
	2.42	0.89	0.58
	2.3	1.07	1.09
	5.71	0.98	0.97
	Subdural Meninges Monocytes (% of CD45+ cells)
	0.9	0.15	0.5
	0.41	0.08	0.07
	0.78	0.1	0.25
	0.61	0.21	0.34
	Choroid Plexus CD206+MHCII low (% of CD45+ cells)
	28.25	4.09	6.77
	24.41	2.63	5.38
	11.6	1.21	4.23
	33.07	1.76	5.66
	Choroid Plexus CD206+MHCII+ (% of CD45+ cells)
	7.52	26.56	21.28
	13.6	21.31	20.56
	8.91	13.09	18.92
	7.64	24.17	28.32
	Choroid Plexus MdCs (% of CD45+ cells)
	1.17	0.42	0.98
	0.06	0.48	0.97
	0.52	0.78	0.65
	1.51	1.19	0.39
	Choroid Plexus monocytes (% of CD45+ cells)
	0.94	0.13	0.64
	1.08	0.13	0.17
	1.07	0.05	0.37
	0.53	0.21	0.07
