# Supplementary material for: Microglia and CD206+ border-associated mouse macrophages maintain their embryonic origin during Alzheimer’s disease
Source: eLife. 2021 Oct 5;10:e71879. doi: 10.7554/eLife.71879 (PMC8523151; doi:10.7554/eLife.71879)
Supplement: Figure 3—source data 1. [file elife-71879-fig3-data1.xlsx]

## Sheet: Sheet1
Figure 3B	Months of TAM pulsing	Kit(MerCreMer)/R26(YFP)						APP-KI-Kit(MerCreMer)/R26(YFP)
		Microglia (YFP+% )
	2	0.04	0.12	0.14	0.07	0.08		0.13	0.21	0.21	0.22	0.06
	4	0.1	0.36	0.33	0.34	0.17		0.16	0.18	0.08	0.14	0.12
	6	0.16	0.14	0.1	0.1	0.11		0.09	0.39	0.22	0.12	1.13
	8	0.31	0.3	0.19	0.25	0.22		0.34	0.26	0.2	0.31	0.36
		CD11c+Microglia(YFP+% )
	2	0	0	0.91	0	0		0.05	0.09	0.07	0.46	0.08
	4	0	0	0	0	0.63		0.17	0	0	0.44	0.37
	6	1.5	3.19	1.69	0	0.51		0	0.05	0.79	0.03	1.52
	8	0.15	0.26	0.13	0.63	2		0.55	0.13	0.08	0.15	0.38
		MdCs(YFP+% )
	2	59.62	58.48	46.29	48.36	50.63		73.63	64.51	70.92	92.83	58.45
	4	67.24	67.87	68.74	91.56	80.43		102.82	85.37	102.09	80.95	89.29
	6	89.84	86.13	87.65	83.07	81.12		94.38	106.01	103.03	105.17	98.53
	8	95.59	96.43	91.47	93.5	112.86		91.88	100.2	90.55	84.62	88.29
		Monocytes(YFP+% )
	2	95	105.71	109.49	104.23	88.28		100.34	86.01	88.65	83.54	92.23
	4	96.55	92.24	96.01	99.06	94.35		101.25	103.4	68.09	118.56	101.19
	6	82.89	109.66	96.99	107.87	109.44		100	136.75	109.7	105.17	124.02
	8	107.28	104.51	104.84	97.72	98.57		99.58	107.82	101.09	102.45	98.02
		CD11a+ (YFP+% )
	2	95	98.1	91.2	93.12	68.62		89.04	97.15	98.94	94.51	59.8
	4	107.33	94.46	96.23	90.31	91.52		101.88	85.03	76.64	104.87	97.79
	6	94.12	99.16	104.82	103.54	94.13		92.7	142.4	118.79	96.63	102.7
	8	99.81	91.17	91.86	91.04	138.57		85.99	95.99	82.55	91.82	96.94
Figure 3D	YFP+ %	Microglia	CD11c+ microglia	MdCs	Monocytes	CD11a+	Neutrophils
		34.1	34.8	2.79	3.3	4.76	3.48
		42.7	43.8	4.67	3.45	4.13	3.52
		24.1	23.3	2.54	4.1	1.89	1.75
		27.8	28.4	1.83	2.23	1.24	2.31
