# Supplementary material for: Microglia and CD206+ border-associated mouse macrophages maintain their embryonic origin during Alzheimer’s disease
Source: eLife. 2021 Oct 5;10:e71879. doi: 10.7554/eLife.71879 (PMC8523151; doi:10.7554/eLife.71879)
Supplement: Figure 4—figure supplement 1—source data 1. [file elife-71879-fig4-figsupp1-data1.xlsx]

## Sheet: Sheet1
Figure 4 figure supplement 1	Months of TAM pulsing	Kit(MerCreMer)/R26(YFP)						APP-KI-Kit(MerCreMer)/R26(YFP)
		Dura mater Monocytes (YFP+% )
	2	88.09	93.37	73.6	71.94	101.29		119.21	89.97	107.26	109.26	98.8
	4	98.48	99.23	76.89	91.24	116.36		116.94	94.83	107.41	113.13	106.52
	6	100.57	120	76.76	82.24			93.56	99.1	88.97	86.77	83.36
	8	87.36	96.76	81.6	84.5			116.91	119.25	110.16	96.1	95.03
		Dura mater CD11a+ (YFP+% )
	2	106.36	94.48	96.45	92.35	94.19		112.99	92.26	96.53	100.62	89.56
	4	90.86	78.98	75.56	89.44	85.28		96.77	85.14	94.15	108.1	112.5
	6	84.05	101.88	59.12	90.46			86.49	82.88	83.19	69.52	76.61
	8	90.48	104.58	80.42	89.74			88.48	89.5	108.2	80.33	95.42
		Subdural Meninges Monocytes (YFP+% )
	2	124.86	132	86.86	93.2	120.71		93.38	114.63	123.78	96.5	82.73
	4	99.5	116.03	104.53	118.36	128.61		108.28	82.92	84.25	91.37	76.59
	6	68.12	100	86.84	100			66.18	88.51	78.2	127.48	95.11
	8	100.48	72.64	84.15	90.49			69.65	98.04	102.93	115.58	97.89
		Subdural Meninges CD11a+ (YFP+% )
	2	92	81.71	121.09	86.43	96.25		109.72	98.42	79.44	118.35	82.78
	4	90.55	69.69	75.26	118.9	86.3		87.12	87.73	88.61	98.12	108.38
	6	74.39	80	75.19	75.08			81.82	109.39	71.4	80.77	66.53
	8	75.24	76.26	75.3	74.18			66.4	74.29	66.78	91.9	79.02
		Choroid Plexus Monocytes (YFP+% )
	2	118.18	73.07	111.33	97.79			116.6	118.5	72.5	90.1
	4	87.08	118.67	104.55	96.4			110.53	103.87	68	116.55
	6	87.57	85.8	88.27	91.48			95.92	111	103.78	86.42
	8	100	90.91	113.64	102.15			111.11	83.5	79.81	111.17
		Choroid Plexus CD11a+ (YFP+% )
	2	116.28	75.12	79.74	83.33			88.8	95.6	94.9	115.9	85.8
	4	79.9	91.29	75.32	85.6			71.26	111.86	95.2	82.75	75
	6	70.05	91	115.74	115.38			86.88	86.81	82.49	70.33	75.61
	8	102.8	86.91	70	104.29			95.7	85.5	77.64	103.5	92.54
