# Supplementary material for: Microglia and CD206+ border-associated mouse macrophages maintain their embryonic origin during Alzheimer’s disease
Source: eLife. 2021 Oct 5;10:e71879. doi: 10.7554/eLife.71879 (PMC8523151; doi:10.7554/eLife.71879)
Supplement: Figure 4—figure supplement 2—source data 1. [file elife-71879-fig4-figsupp2-data1.xlsx]

## Sheet: Sheet1
Fig.4 figure supplement 2		Dura mater
	YFP+ %	CD206+MHCII low	CD206+ MHCII+	MdC	Monocytes	CD11a+	Neutrophils
		4.76	2.14	2.64	3.2	3.68	2.38
		3.61	2.07	1.76	4.05	3.51	2.42
		4.33	1.91	4.92	4.12	5.8	4.22
		Subdural Meninges
		8.37	5.8	6.82	4	2.77	2.54
		13.4	5.39	4.71	4.2	2.88	3.39
		12.1	5.91	4.17	4.82	4.55	6.62
		Choroid Plexus
		16.6	5.11	2.56	4.44	4.55	3.57
		18.2	6.13	0	0	0	6.67
		12.2	9.68	5.88	0	7.76	0
