# Supplementary material for: Microglia and CD206+ border-associated mouse macrophages maintain their embryonic origin during Alzheimer’s disease
Source: eLife. 2021 Oct 5;10:e71879. doi: 10.7554/eLife.71879 (PMC8523151; doi:10.7554/eLife.71879)
Supplement: Figure 4—source data 1. [file elife-71879-fig4-data1.xlsx]

## Sheet: Sheet1
Figure 4	Months of TAM pulsing	Kit(MerCreMer)/R26(YFP)						APP-KI-Kit(MerCreMer)/R26(YFP)
		Dura mater CD206+ MHCII low (YFP+% )
	2	18.18	8.78	3.4	2.3	3.29		14.35	3.21	10.19	1.45	2.81
	4	9.24	6.22	11.69	11.15	22.03		8.63	3.12	11.56	6.13	6.44
	6	5.67	8.05	9.44	8.42			6.63	5.6	6.37	7.68	7.89
	8	19.87	25.95	14.72	11.94			11.99	13.38	9.77	14.33	15.33
		Dura mater CD206+ MHCII+(YFP+% )
	2	18.91	14.09	9.49	8.52	11.03		20.45	12.12	21.77	9.38	17.39
	4	27.67	21.66	28.67	25.62	32.24		27.46	31.38	40.92	22.36	26.89
	6	27.21	28.71	18.71	29.7			28.07	23.42	27.32	25.81	20.95
	8	32.68	33.4	28.34	28.38			27.45	38.75	30.47	34.96	48.91
		Dura mater MdCs (YFP+% )
	2	80.64	103.87	68.53	71.43	81.94		61.02	85.1	74.76	91.05	82.33
	4	68.02	51.02	57.78	88.54	84.58		68.95	83.2	90.84	97.37	83.42
	6	75.78	94.82	72.65	80.26			74.43	99.28	88.44	81.94	75.75
	8	93.6	111.83	67.95	87.12			86.52	109.5	103.52	83.25	84.01
		Subdural Meninges CD206+ MHCII low (YFP+% )
	2	1.08	0.32	0.13	0.07	0.09		0.28	0.98	0.51	0.25	0.05
	4	0	0.45	0.42	0.08	0.34		0.64	0.1	0.38	0.13	0.38
	6	0.6	1.1	0	0.29			0.71	1.26	0.92	1.18	1.36
	8	0.71	1.27	0.4	0.92			0.75	0.63	1.91	1.53	0.92
		Subdural Meninges CD206+ MHCII+ (YFP+% )
	2	3.71	3.8	2.06	0.52	1.43		0	2.96	15.96	2.39	2.18
	4	6.52	1.67	0	4.58	0.89		0	1.84	4.44	7.73	4.36
	6	9.46	9.84	8.05	6.31			5.29	5.9	8.84	9.34	15.4
	8	9.1	10.25	9.45	7.09			10.69	7.56	18.89	19.08	7.5
		Subdural Meninges MdCs (YFP+% )
	2	107.65	100	74.86	76.19	87.14		118.3	91.64	77.52	98.73	90.45
	4	96.52	79.79	74.22	90.68	70.91		69.33	70.15	78.18	81.24	99.13
	6	81.47	86.6	66.17	67.57			65.64	70.11	69.6	86.98	99.19
	8	82.96	83.33	66.46	94.57			72.91	92.59	84.53	96.82	115.85
		Choroid Plexus CD206+ MHCII low (YFP+% )
	2	0	6.3	6.94	8.16	2.6		3.64	5.38	3.25	2.49	3.83
	4	11.24	7.84	8.25	7.77	8.61		12.03	4.12	9.56	0.45	0.61
	6	3.5	6.54	5.77	6.13			1.38	5.4	2.41	6.92	4.45
	8	6.59	18.03	8.52	8.54			5.05	3.05	4.41	2.93	9.45
		Choroid Plexus CD206+ MHCII+ (YFP+% )
	2	4.51	11	5.54	6.75	5.47		5.38	7.26	3.47	5.48	7.21
	4	12.82	9.21	13.35	11.88	15.71		12.25	12.38	12.17	6.4	9.89
	6	7.86	9.58	10.31	7.61			17.66	23.43	7.23	14.39	13.14
	8	13.43	17.55	10	11.78			12.8	21.25	8.8	12.77	17.62
		Choroid Plexus MdCs (YFP+% )
	2	112.4	78.07	78.67	81.62			107.7	77.4	96.5	82
	4	79.9	72.61	90.26	102.83			101.21	88.14	100	93.24
	6	77.76	77	88.27	109.89			104.56	71.33	78.26	73.39
	8	102.8	86.91	70	104.29			95.7	85.5	77.64	103.5
