# Supplementary figures and images for: Microglia and CD206+ border-associated mouse macrophages maintain their embryonic origin during Alzheimer’s disease
Source: eLife journal article supplement (doi:10.7554/elife.71879), 2021-10-05

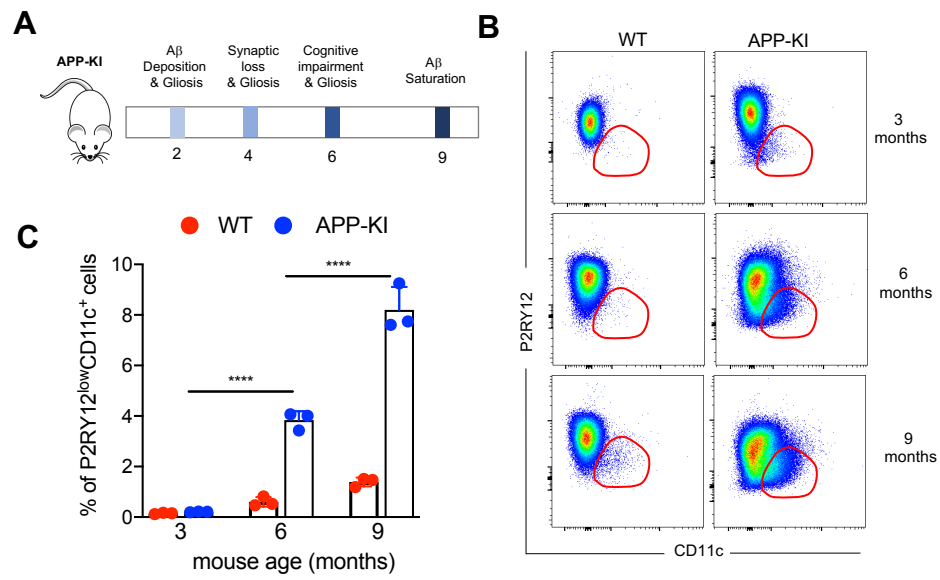

Fig. 1- figure supplement 1

Supplement: supp [file elife-71879-supp-v1.zip]

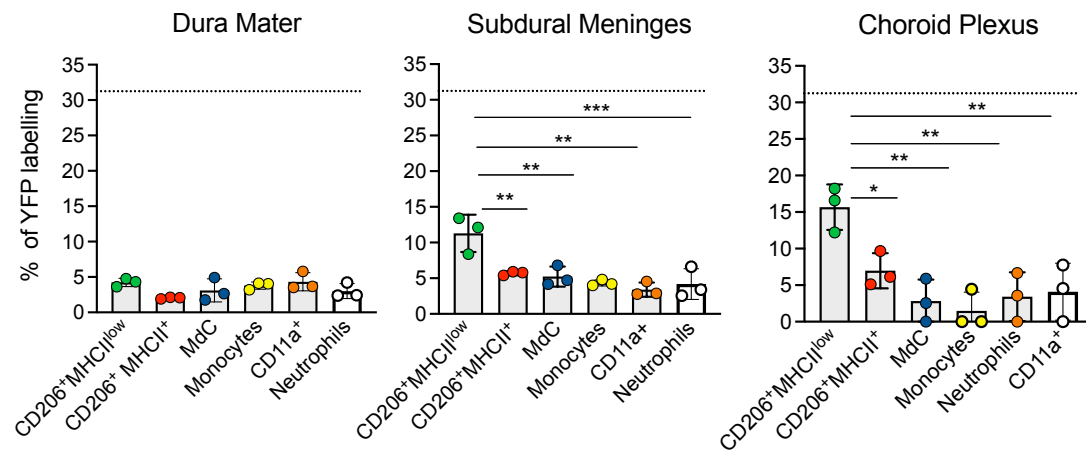

Fig. 4: Figure supplement 2

Supplement: supp [file elife-71879-supp-v1.zip]

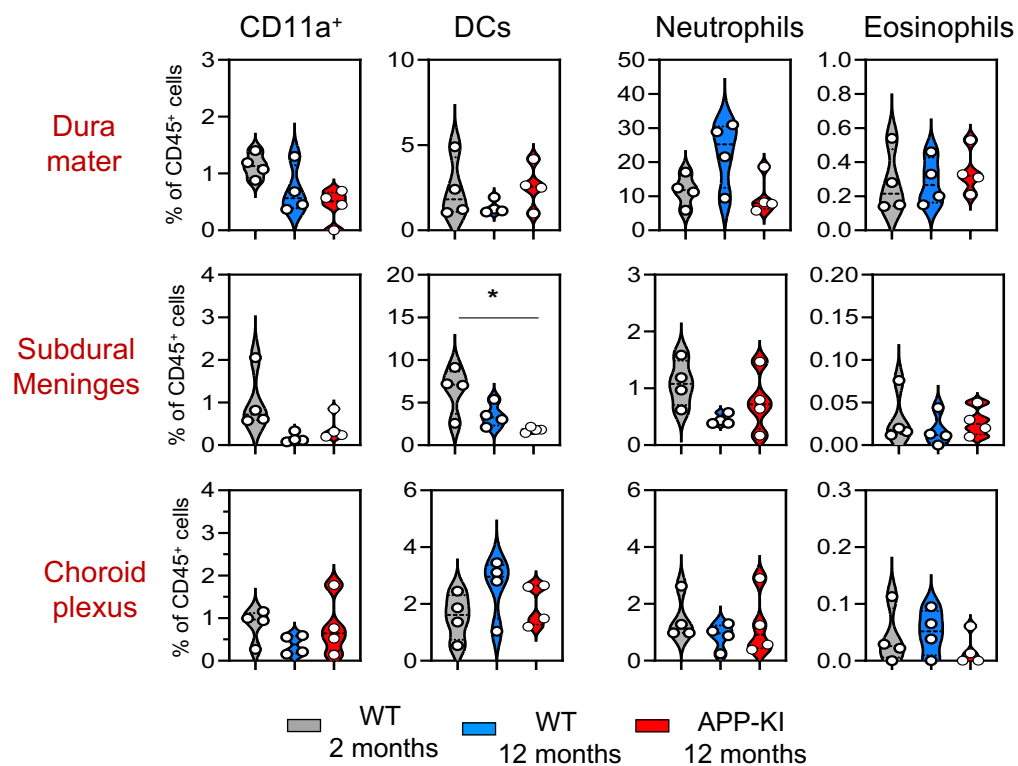

Fig. 2: Figure supplement 2

Supplement: supp [file elife-71879-supp-v1.zip]

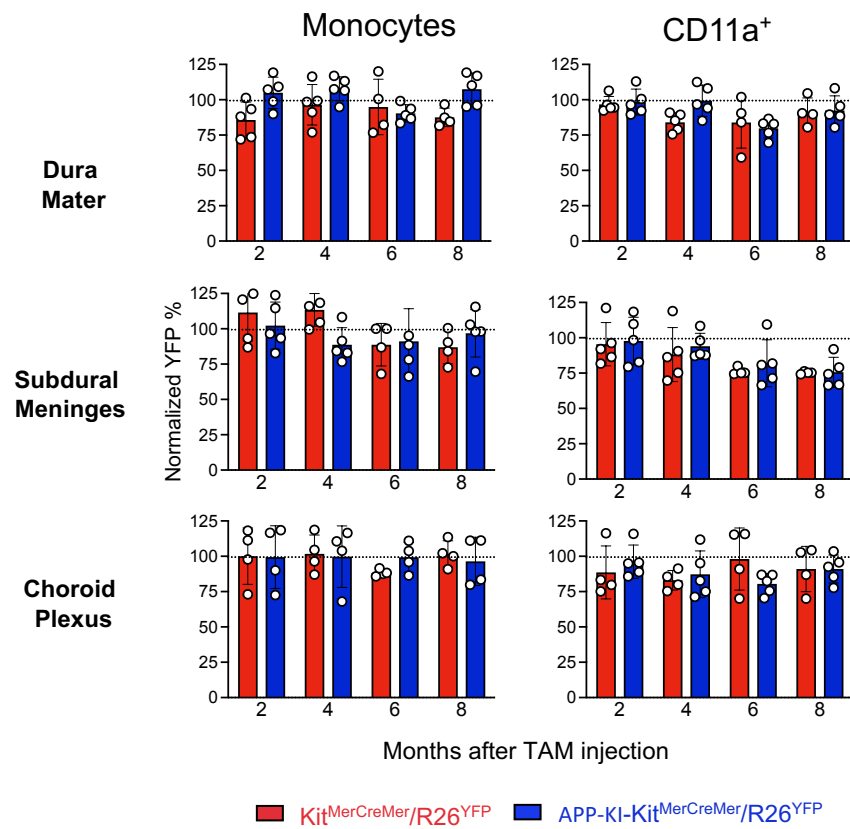

Fig. 4: Figure supplement 1

Supplement: supp [file elife-71879-supp-v1.zip]

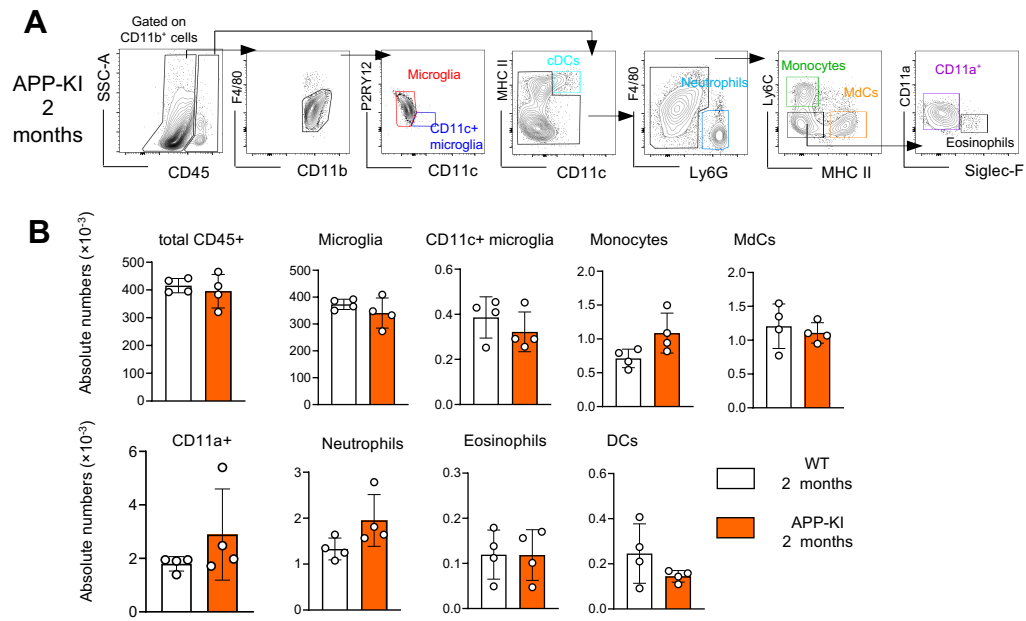

Fig. 1- figure supplement 2

Supplement: supp [file elife-71879-supp-v1.zip]
